# Supplementary material for: Prior CT imaging history for patients who undergo PAN CT for acute traumatic injury
Source: PeerJ. 2015 Jun 2;3:e963. doi: 10.7717/peerj.963 (PMC4458134; doi:10.7717/peerj.963)
Supplement: Supplemental Information 1 [file peerj-03-963-s001.xlsx]

## Sheet: Data
								Number of Prior CT Scans in Each Category (Done at any Christus facility)
	Sex	Age	Race	ISS Score		Mechanism of Injury	Date of Pan-Scan (mm/dd/yyyy)	Cervical Spine	Facial Bones	Thoracic Spine	Lumbar Spine	Angio of Neck	Chest	Soft Tissue Neck	Abdomen/ Pelvis	Head	Extremity
Patient Number					ISS<9 1													Total Previous CT Done on Subject	Had Previous CT y/n
					ISS<9 = 1														1=n
					ISS 9-16 =2														2=y
					ISS >16 = 3
250	1	26	2	1	1	1	2012-01-02	0	0	0	0	0	0	0	0	0	0	0	1
363	1	30	2	1	1	1	2012-01-09	0	0	0	0	0	0	0	0	0	0	0	1
178	1	18	1	1	1	3	2012-01-14	0	0	0	0	0	0	0	0	0	0	0	1
253	2	27	2	1	1	1	2012-01-16	0	0	0	0	0	0	0	0	0	0	0	1
183	2	49	2	1	1	8	2012-01-23	0	0	0	0	0	0	0	0	0	0	0	1
257	2	49	2	1	1	8	2012-01-23	0	0	0	0	0	0	0	0	1	0	1	2
258	1	18	2	1	1	1	2012-02-09	0	0	0	0	0	0	0	0	0	0	0	1
322	1	37	1	1	1	6	2012-02-14	0	0	0	0	0	0	0	0	0	0	0	1
189	1	50	1	1	1	6	2012-02-23	0	0	0	0	0	0	0	0	0	0	0	1
196	2	25	1	1	1	1	2012-03-05	0	0	0	0	0	0	0	0	0	0	0	1
370	1	18	1	1	1	1	2012-03-08	0	0	0	0	0	0	0	0	0	0	0	1
206	2	49	2	1	1	6	2012-03-23	0	0	0	0	0	0	0	0	0	0	0	1
352	2	49	2	1	1	6	2012-03-30	0	0	0	0	0	0	0	0	1	1	2	2
212	1	26	2	1	1	1	2012-04-05	0	0	0	0	0	0	0	0	0	0	0	1
269	1	17	2	1	1	1	2012-04-11	0	0	0	0	0	0	0	0	0	0	0	1
394	1	40	1	1	1	1	2012-04-18	1	1	0	0	0	0	1	0	1	0	4	2
273	1	17	2	1	1	1	2012-05-03	0	0	0	0	0	0	0	0	0	0	0	1
232	1	40	1	1	1	1	2012-05-11	0	0	0	0	0	0	0	0	0	0	0	1
413	1	40	1	1	1	1	2012-05-11	0	0	0	0	0	0	0	0	0	0	0	1
234	1	27	2	1	1	8	2012-05-18	0	0	0	0	0	0	0	0	0	0	0	1
419	1	27	2	1	1	8	2012-05-18	0	0	0	0	0	0	1	0	1	0	2	2
235	2	25	2	1	1	1	2012-05-24	0	0	0	0	0	0	0	1	0	0	1	2
238	1	22	1	1	1	1	2012-05-31	0	0	0	0	0	0	0	0	0	0	0	1
241	2	27	2	1	1	1	2012-06-03	0	0	0	0	0	0	0	0	0	0	0	1
242	1	20	1	1	1	6	2012-06-03	0	0	0	0	0	0	0	0	0	0	0	1
249	2	25	1	1	1	6	2012-06-14	1	0	0	0	0	0	0	0	0	0	1	2
126	1	17	2	1	1	11	2012-06-17	0	0	0	0	0	0	0	0	0	0	0	1
141	1	17	2	1	1	11	2012-06-17	0	0	0	0	0	0	0	0	0	0	0	1
457	1	44	1	1	1	3	2012-06-21	1	0	0	0	0	0	0	0	0	0	1	2
134	1	44	2	1	1	11	2012-06-27	0	0	0	0	0	0	0	0	0	0	0	1
129	1	66	1	1	1	11	2012-06-29	0	0	0	0	0	0	0	0	0	0	0	1
127	1	26	2	1	1	11	2012-07-01	0	0	0	0	0	0	0	0	0	0	0	1
115	1	42	2	1	1	6	2012-07-21	0	0	0	0	0	0	0	0	0	0	0	1
111	1	36	2	1	1	7	2012-07-23	0	0	0	0	0	0	0	0	0	0	0	1
167	2	39	2	1	1	1	2012-07-27	0	0	0	0	0	0	0	0	0	0	0	1
169	1	21	6	1	1	1	2012-07-28	0	0	0	0	0	0	0	0	0	0	0	1
109	1	22	2	1	1	1	2012-07-29	0	0	0	0	0	0	0	0	0	0	0	1
171	1	22	2	1	1	1	2012-07-29	0	0	0	0	0	0	0	0	0	0	0	1
107	1	61	3	1	1	3	2012-08-02	1	0	0	0	0	0	0	0	1	0	2	2
105	2	14	1	1	1	3	2012-08-04	0	0	0	0	0	0	0	0	0	0	0	1
102	1	39	1	1	1	1	2012-08-07	0	0	0	0	0	0	0	0	0	0	0	1
99	2	30	2	1	1	13	2012-08-11	0	0	0	0	0	0	0	0	0	0	0	1
100	1	22	1	1	1	11	2012-08-11	0	0	0	0	0	0	0	0	0	0	0	1
93	1	19	2	1	1	11	2012-08-18	0	0	0	0	0	0	0	0	0	0	0	1
87	1	17	1	1	1	11	2012-08-25	0	0	0	0	0	0	0	0	0	0	0	1
79	1	22	1	1	1	7	2012-09-01	0	0	0	0	0	0	0	0	0	0	0	1
294	2	41	2	1	1	1	2012-09-13	0	0	0	0	0	0	0	0	0	0	0	1
65	1	26	2	1	1	17	2012-09-22	1	1	0	0	1	1	0	0	0	0	4	2
53	1	23	2	1	1	1	2012-10-04	0	0	0	0	0	0	0	0	0	0	0	1
51	1	33	2	1	1	1	2012-10-06	0	0	0	0	0	0	0	0	0	0	0	1
52	1	24	1	1	1	1	2012-10-06	0	0	0	0	0	0	0	0	0	0	0	1
45	1	27	2	1	1	11	2012-10-14	0	0	0	0	0	0	0	0	0	0	0	1
35	1	15	2	1	1	10	2012-10-26	0	0	0	0	0	0	0	0	0	0	0	1
28	2	17	2	1	1	1	2012-11-05	0	0	0	0	0	0	0	0	0	0	0	1
57	1	23	2	1	1	12	2012-11-25	0	0	0	0	0	1	0	1	0	0	2	2
14	1	28	2	1	1	11	2012-12-04	1	0	0	0	0	0	0	0	0	0	1	2
12	1	41	2	1	1	1	2012-12-06	0	0	0	0	0	0	0	0	0	0	0	1
6	1	47	2	1	1	11	2012-12-29	0	0	0	0	0	0	0	0	0	0	0	1
366	1	60	2	2	1	10	2012-02-07	0	0	0	0	0	0	1	0	0	0	1	2
263	1	46	2	2	1	3	2012-02-24	0	0	0	0	0	0	0	0	0	0	0	1
333	1	62	1	2	1	7	2012-03-02	0	0	0	0	0	0	0	0	0	0	0	1
395	1	49	1	2	1	1	2012-04-18	0	0	0	0	0	0	0	0	0	0	0	1
396	1	31	2	2	1	7	2012-04-19	0	0	0	0	0	0	0	0	0	0	0	1
425	2	15	2	2	1	1	2012-05-24	0	0	0	0	0	0	0	0	0	0	0	1
118	1	50	1	2	1	7	2012-07-16	0	0	0	0	0	0	0	0	0	0	0	1
110	2	30	2	2	1	1	2012-07-25	0	0	0	0	0	0	0	0	0	0	0	1
41	1	19	2	2	1	2	2012-10-21	0	0	0	0	0	0	0	0	0	0	0	1
54	1	43	2	3	1	3	2012-10-03	0	0	0	0	0	0	0	0	0	0	0	1
38	1	47	2	3	1	3	2012-10-25	0	0	0	0	0	0	0	0	0	0	0	1
36	1	82	1	3	1	3	2012-10-26	0	0	0	0	0	0	0	0	0	0	0	1
179	1	44	1	4	1	7	2012-01-01	0	0	0	0	0	0	0	0	0	0	0	1
364	1	61	2	4	1	4	2012-01-16	0	0	0	0	0	0	0	0	0	0	0	1
314	2	72	2	4	1	1	2012-01-23	1	0	0	0	0	0	0	0	0	0	1	2
354	1	19	2	4	1	1	2012-03-25	1	0	0	0	0	0	0	0	0	0	1	2
205	1	42	1	4	1	2	2012-03-27	0	0	0	0	0	0	0	0	0	0	0	1
410	1	46	1	4	1	3	2012-05-07	0	0	0	0	0	0	0	0	0	0	0	1
233	1	47	2	4	1	8	2012-05-13	0	0	0	0	0	0	0	0	0	0	0	1
369	1	40	2	4	1	8	2012-05-24	0	0	0	0	0	0	0	0	0	0	0	1
427	2	66	2	4	1	1	2012-05-26	2	0	1	0	0	0	0	0	0	0	3	2
437	1	22	2	4	1	6	2012-06-04	0	0	0	0	0	0	0	0	0	0	0	1
439	1	44	2	4	1	1	2012-06-05	0	0	0	0	0	0	0	0	0	0	0	1
442	1	71	1	4	1	1	2012-06-09	0	0	0	0	0	0	0	0	0	0	0	1
248	1	48	1	4	1	6	2012-06-12	0	0	0	0	0	0	0	0	0	0	0	1
132	2	23	2	4	1	1	2012-06-27	0	0	0	0	0	0	0	0	0	0	0	1
133	1	32	1	4	1	1	2012-06-27	0	0	0	0	0	0	0	0	0	0	0	1
282	1	32	1	4	1	1	2012-06-27	0	0	0	0	0	0	0	0	0	0	0	1
152	2	81	2	4	1	1	2012-07-02	0	0	0	0	0	0	0	0	0	0	0	1
125	1	41	2	4	1	6	2012-07-03	0	0	0	0	0	0	0	0	0	0	0	1
153	2	77	2	4	1	1	2012-07-03	0	0	0	0	0	0	0	0	0	0	0	1
283	1	41	2	4	1	6	2012-07-03	1	1	0	0	0	0	1	0	2	0	5	2
286	1	14	6	4	1	1	2012-07-16	0	0	0	0	0	0	0	0	0	0	0	1
165	1	49	2	4	1	8	2012-07-22	0	0	0	0	0	0	0	0	0	0	0	1
287	1	14	6	4	1	1	2012-07-23	0	0	0	0	0	0	0	0	0	0	0	1
175	1	29	1	4	1	10	2012-08-03	0	0	0	0	0	0	0	0	0	0	0	1
295	1	29	2	4	1	4	2012-09-17	0	0	0	0	0	0	0	0	0	0	0	1
66	1	16	1	4	1	10	2012-09-22	0	0	0	0	0	0	0	0	0	0	0	1
64	1	25	2	4	1	1	2012-09-23	0	0	0	0	0	0	0	0	0	0	0	1
55	1	27	2	4	1	6	2012-09-30	0	0	0	0	0	0	0	0	0	0	0	1
297	1	21	2	4	1	1	2012-10-08	0	0	0	0	0	0	0	0	0	0	0	1
37	2	40	2	4	1	1	2012-10-25	0	0	0	0	0	0	0	0	0	0	0	1
31	1	29	2	4	1	1	2012-11-07	1	1	0	0	1	1	0	1	1	0	6	2
18	1	32	2	4	1	1	2012-11-18	0	0	0	0	0	0	0	0	0	0	0	1
11	1	48	2	4	1	3	2012-12-14	0	0	0	0	0	0	0	0	0	0	0	1
8	1	27	2	4	1	1	2012-12-26	0	0	0	0	0	0	0	0	0	0	0	1
5	1	27	1	4	1	11	2012-12-30	0	0	0	0	0	1	0	1	0	0	2	2
4	1	19	1	4	1	6	2012-12-31	0	0	0	0	0	0	0	0	0	0	0	1
362	1	34	2	5	1	1	2012-01-03	0	0	0	0	0	0	0	0	0	0	0	1
255	1	24	1	5	1	4	2012-01-16	0	0	0	0	0	0	0	0	0	0	0	1
313	2	40	2	5	1	1	2012-01-23	0	0	0	0	0	0	0	0	0	0	0	1
315	1	54	1	5	1	3	2012-01-28	0	0	0	0	0	0	0	0	0	0	0	1
260	1	17	1	5	1	1	2012-02-14	1	1	0	0	0	0	0	0	0	0	2	1
262	1	21	3	5	1	4	2012-02-16	1	1	1	0	0	0	0	0	0	0	3	2
327	1	25	1	5	1	7	2012-02-23	0	0	0	0	0	0	0	0	0	0	0	1
337	1	24	3	5	1	6	2012-03-08	1	1	0	0	0	0	0	0	0	0	2	2
342	1	54	2	5	1	8	2012-03-16	0	0	0	0	0	0	0	0	0	0	0	1
382	1	56	2	5	1	7	2012-04-06	0	0	0	0	0	0	0	0	0	0	0	1
390	2	21	1	5	1	1	2012-04-15	0	0	0	0	0	0	0	0	0	0	0	1
404	1	30	1	5	1	1	2012-05-01	0	0	0	0	0	0	0	0	1	0	1	2
231	1	35	2	5	1	1	2012-05-10	0	0	0	0	0	0	0	1	0	0	1	2
275	2	28	1	5	1	1	2012-06-01	0	0	0	0	0	0	0	0	0	0	0	1
243	2	27	2	5	1	1	2012-06-05	0	0	0	0	0	0	0	0	0	0	0	1
441	1	25	2	5	1	1	2012-06-07	0	0	0	0	0	0	0	0	0	0	0	1
244	2	31	1	5	1	6	2012-06-09	0	0	0	0	0	0	0	0	0	0	0	1
446	1	31	1	5	1	1	2012-06-12	0	0	0	0	0	0	0	0	0	0	0	1
447	1	69	2	5	1	8	2012-06-13	0	0	0	0	0	0	0	0	0	0	0	1
144	1	64	2	5	1	3	2012-06-14	0	0	0	0	0	0	0	0	0	0	0	1
449	1	64	2	5	1	3	2012-06-14	0	1	0	0	1	0	0	0	4	0	6	2
453	2	63	1	5	1	3	2012-06-16	0	0	0	0	0	0	0	0	0	0	0	1
142	1	18	2	5	1	1	2012-06-17	0	0	0	0	0	0	0	0	0	0	0	1
279	1	17	3	5	1	1	2012-06-17	0	0	0	0	0	0	0	0	0	0	0	1
456	1	55	1	5	1	10	2012-06-19	0	0	0	0	0	0	0	0	0	0	0	1
139	1	54	2	5	1	11	2012-06-20	0	0	0	0	0	0	0	0	0	0	0	1
458	2	49	1	5	1	1	2012-06-21	3	0	1	0	0	0	0	0	0	0	4	2
459	2	26	2	5	1	1	2012-06-22	0	0	0	0	0	0	0	0	0	0	0	1
460	2	53	2	5	1	1	2012-06-22	0	0	0	0	0	0	0	0	0	0	0	1
147	2	28	2	5	1	1	2012-06-24	0	0	0	0	0	0	0	0	0	0	0	1
280	2	28	2	5	1	1	2012-06-24	0	0	0	0	0	0	0	0	0	0	0	1
150	1	56	2	5	1	1	2012-06-29	0	0	0	0	0	0	0	0	0	0	0	1
168	2	43	2	5	1	1	2012-07-27	0	0	0	0	0	0	0	0	0	0	0	1
172	1	16	2	5	1	7	2012-07-30	0	0	0	0	0	0	0	0	0	0	0	1
174	1	75	2	5	1	1	2012-08-01	0	0	0	0	0	0	0	0	0	0	0	1
289	1	18	2	5	1	1	2012-08-11	0	0	0	0	0	0	0	0	0	0	0	1
88	2	17	6	5	1	1	2012-08-25	0	0	0	0	0	0	0	0	0	0	0	1
86	1	21	2	5	1	1	2012-08-28	0	0	0	0	0	0	0	0	0	0	0	1
292	1	21	2	5	1	1	2012-08-28	0	0	0	0	0	0	0	0	0	0	0	1
77	1	33	1	5	1	15	2012-09-02	0	0	0	0	0	0	0	0	0	0	0	1
68	1	36	2	5	1	1	2012-09-12	0	0	0	0	0	0	0	0	0	0	0	1
43	1	26	2	5	1	12	2012-10-17	1	1	0	0	0	1	0	1	1	0	5	2
9	2	15	2	5	1	12	2012-12-23	0	0	0	0	0	0	0	0	0	0	0	1
305	1	20	2	5	1	1	2012-12-25	0	0	0	0	0	0	0	0	0	0	0	1
412	1	55	2	6	1	8	2012-05-09	0	0	0	0	0	0	0	0	0	0	0	1
276	1	38	2	6	1	1	2012-06-07	0	0	0	0	0	0	0	0	0	0	0	1
149	1	37	2	6	1	7	2012-06-29	0	0	0	0	0	0	0	0	0	0	0	1
155	1	62	2	6	1	1	2012-07-04	0	0	0	0	0	0	0	0	0	0	0	1
39	1	37	2	7	1	7	2012-10-25	0	0	0	0	0	0	0	0	0	0	0	1
309	1	27	1	8	1	1	2012-01-13	0	0	0	0	0	0	0	0	0	0	0	1
326	2	26	2	8	1	1	2012-02-21	0	0	0	0	0	0	0	0	0	0	0	1
372	1	18	1	8	1	1	2012-03-10	0	0	0	0	0	0	0	0	0	0	0	1
265	2	24	1	8	1	3	2012-03-19	0	0	0	0	0	0	0	0	0	0	0	1
418	1	35	2	8	1	1	2012-05-16	0	0	0	0	0	0	0	0	0	0	0	1
436	1	24	1	8	1	7	2012-06-01	0	0	0	0	0	0	0	0	0	0	0	1
452	2	42	2	8	1	1	2012-06-16	0	0	0	0	0	0	0	0	0	0	0	1
137	1	32	2	8	1	8	2012-06-21	0	0	0	0	0	0	0	0	0	0	0	1
154	1	38	2	8	1	8	2012-07-04	0	0	0	0	0	0	0	0	0	0	0	1
159	2	54	1	8	1	7	2012-07-14	0	0	0	0	0	0	0	0	0	0	0	1
90	1	51	1	8	1	7	2012-08-22	0	0	0	0	0	0	0	0	0	0	0	1
47	1	18	2	8	1	1	2012-10-10	0	0	0	0	0	0	0	0	0	0	0	1
302	2	77	1	8	1	1	2012-12-22	0	0	0	0	0	0	0	0	0	0	0	1
180	1	21	2	9	2	7	2012-01-18	0	0	0	0	0	0	0	0	0	0	0	1
318	2	60	1	9	2	8	2012-01-30	0	0	0	0	0	0	0	0	0	0	0	1
259	1	30	2	9	2	1	2012-02-09	0	0	0	0	0	0	0	0	0	0	0	1
261	2	30	2	9	2	8	2012-02-14	0	0	0	0	0	0	0	0	0	0	0	1
323	1	29	2	9	2	7	2012-02-14	0	0	0	0	0	0	0	0	0	0	0	1
191	1	27	3	9	2	1	2012-02-26	0	0	0	0	0	0	0	0	0	0	0	1
331	1	27	3	9	2	1	2012-02-26	2	0	0	0	0	0	0	0	0	0	2	2
334	2	24	2	9	2	1	2012-03-04	0	0	0	0	0	0	0	0	0	0	0	1
199	1	19	2	9	2	8	2012-03-09	0	0	0	0	0	0	0	0	0	0	0	1
374	1	41	2	9	2	1	2012-03-11	0	0	0	0	0	0	0	0	0	0	0	1
264	1	39	1	9	2	4	2012-03-13	0	0	0	0	0	0	0	0	0	0	0	1
375	1	49	2	9	2	3	2012-03-15	0	0	0	0	0	0	0	0	0	0	0	1
343	1	50	1	9	2	3	2012-03-17	2	0	0	0	0	0	1	0	0	0	3	2
346	1	61	1	9	2	1	2012-03-19	0	0	0	0	0	0	0	0	0	0	0	1
203	2	35	1	9	2	6	2012-03-20	0	0	0	0	0	0	0	0	0	0	0	1
355	1	29	2	9	2	7	2012-03-26	0	0	0	0	0	0	0	0	0	0	0	1
356	2	70	1	9	2	1	2012-03-27	0	0	0	0	0	0	0	0	0	0	0	1
349	2	35	1	9	2	6	2012-03-30	0	0	0	0	0	0	0	0	0	0	0	1
378	2	55	1	9	2	10	2012-04-03	0	0	0	0	0	0	0	0	0	0	0	1
387	2	32	2	9	2	1	2012-04-10	0	0	0	0	0	0	0	0	0	0	0	1
388	1	17	1	9	2	7	2012-04-10	0	0	0	0	0	0	0	0	0	0	0	1
391	1	22	2	9	2	1	2012-04-15	0	0	0	0	0	0	0	0	0	0	0	1
393	1	41	2	9	2	1	2012-04-17	0	0	0	0	0	0	0	0	0	0	0	1
398	1	46	2	9	2	7	2012-04-22	0	0	0	0	0	0	0	0	0	0	0	1
399	1	29	1	9	2	7	2012-04-23	0	0	0	0	0	0	0	0	0	0	0	1
225	1	23	2	9	2	6	2012-05-02	0	0	0	0	0	0	0	0	0	0	0	1
272	1	22	2	9	2	1	2012-05-03	0	0	0	0	0	0	0	0	0	0	0	1
405	1	35	2	9	2	1	2012-05-03	0	0	0	0	0	0	0	0	0	0	0	1
411	2	47	2	9	2	7	2012-05-07	0	0	0	0	0	0	0	0	2	0	2	2
229	1	53	2	9	2	8	2012-05-09	0	0	0	0	0	0	0	0	0	0	0	1
414	1	79	2	9	2	8	2012-05-11	2	1	0	0	0	0	0	0	0	0	3	2
423	2	19	2	9	2	1	2012-05-22	0	0	0	0	0	0	0	1	1	0	2	2
429	2	50	2	9	2	1	2012-05-29	0	0	0	0	0	0	0	0	0	0	0	1
431	1	28	2	9	2	1	2012-05-30	0	0	0	0	0	0	0	0	0	0	0	1
239	1	15	1	9	2	1	2012-06-02	0	0	0	0	0	0	0	0	0	0	0	1
438	1	64	1	9	2	1	2012-06-06	0	0	0	0	0	0	0	0	0	0	0	1
120	2	13	3	9	2	1	2012-07-10	0	0	0	0	0	0	0	0	0	0	0	1
117	1	49	1	9	2	10	2012-07-18	0	0	0	0	0	0	0	0	0	0	0	1
164	1	18	2	9	2	1	2012-07-21	0	0	0	0	0	0	0	0	0	0	0	1
166	2	28	2	9	2	1	2012-07-26	0	0	0	0	0	0	0	0	0	0	0	1
108	1	39	2	9	2	10	2012-07-29	0	0	0	0	0	0	0	0	0	0	0	1
296	1	58	1	9	2	2	2012-09-26	0	0	0	0	0	0	0	0	0	0	0	1
49	1	85	2	9	2	10	2012-10-08	0	0	0	0	1	0	0	0	0	1	2	2
298	2	44	2	9	2	1	2012-10-16	1	1	0	0	0	0	0	0	0	0	2	2
33	1	27	1	9	2	3	2012-10-27	0	0	0	0	0	0	0	0	0	0	0	1
17	1	28	2	9	2	12	2012-11-22	0	0	0	0	0	0	0	0	0	0	0	1
306	2	21	1	10	2	8	2012-01-01	0	0	0	0	0	0	0	0	0	0	0	1
251	1	25	1	10	2	3	2012-01-06	1	0	1	0	0	0	0	0	0	0	2	2
319	2	54	1	10	2	1	2012-02-04	0	0	0	0	0	0	0	0	0	0	0	1
190	2	54	2	10	2	6	2012-02-24	0	0	0	0	0	0	0	0	0	0	0	1
368	2	40	2	10	2	1	2012-03-07	0	0	0	0	0	0	0	0	0	0	0	1
371	1	61	1	10	2	1	2012-03-08	0	0	0	0	0	0	0	0	0	0	0	1
341	2	33	2	10	2	1	2012-03-15	0	0	0	0	0	0	0	0	0	0	0	1
376	1	50	2	10	2	1	2012-03-16	0	0	0	0	0	0	0	0	0	0	0	1
344	1	22	1	10	2	1	2012-03-17	0	0	0	0	0	0	0	0	0	0	0	1
357	1	18	2	10	2	1	2012-03-27	0	0	0	0	0	0	0	0	0	0	0	1
360	1	20	2	10	2	3	2012-03-30	0	0	0	0	0	0	0	0	0	0	0	1
361	2	17	1	10	2	1	2012-03-30	1	0	0	0	0	0	0	0	1	0	2	2
210	2	55	1	10	2	3	2012-04-03	0	0	0	0	0	0	0	0	0	0	0	1
211	1	26	2	10	2	4	2012-04-04	0	0	0	0	0	0	0	0	0	0	0	1
380	1	58	1	10	2	7	2012-04-04	0	0	0	0	0	0	0	0	0	0	0	1
381	1	35	2	10	2	1	2012-04-05	0	0	0	0	0	0	0	0	0	0	0	1
215	1	61	2	10	2	1	2012-04-10	0	0	0	0	0	0	0	0	0	0	0	1
220	2	21	1	10	2	1	2012-04-21	0	0	0	0	0	0	0	0	0	0	0	1
270	2	21	1	10	2	1	2012-04-21	1	1	0	0	0	0	0	0	0	0	2	2
224	1	46	2	10	2	7	2012-05-02	0	0	0	0	0	0	0	0	0	0	0	1
227	1	55	1	10	2	8	2012-05-05	0	0	0	0	0	0	0	0	0	0	0	1
422	1	25	2	10	2	10	2012-05-19	0	0	0	0	0	0	0	0	0	0	0	1
424	1	25	2	10	2	1	2012-05-23	1	0	0	0	0	0	0	0	0	0	1	2
428	1	64	2	10	2	7	2012-05-28	0	0	0	0	0	0	0	0	0	0	0	1
277	1	20	2	10	2	1	2012-06-09	0	0	0	0	0	0	0	0	0	0	0	1
444	1	32	2	10	2	6	2012-06-10	4	2	0	0	0	0	1	0	2	0	9	2
140	1	18	1	10	2	11	2012-06-17	0	0	0	0	0	0	0	0	0	0	0	1
455	2	31	2	10	2	1	2012-06-17	0	0	0	0	0	0	0	0	0	0	0	1
146	1	58	2	10	2	1	2012-06-23	0	0	0	0	0	0	0	0	0	0	0	1
160	1	51	1	10	2	7	2012-07-18	0	0	0	0	0	0	0	0	0	0	0	1
161	1	66	2	10	2	3	2012-07-18	0	0	0	0	0	0	0	0	2	0	2	2
94	1	19	2	10	2	11	2012-08-18	0	0	0	0	0	0	0	0	0	0	0	1
59	2	32	2	10	2	1	2012-09-27	0	0	0	0	0	0	0	0	0	0	0	1
200	1	25	2	11	2	1	2012-03-11	0	0	0	0	0	0	0	0	0	0	0	1
401	2	65	2	11	2	1	2012-04-27	0	0	0	0	0	0	0	0	0	0	0	1
222	1	29	2	11	2	1	2012-04-28	0	0	0	0	0	0	0	1	0	0	1	2
40	2	21	1	11	2	1	2012-10-22	0	0	0	0	0	0	0	0	0	0	0	1
16	1	20	2	11	2	1	2012-11-22	0	0	0	0	0	0	0	0	0	0	0	1
421	1	34	2	12	2	7	2012-05-18	0	0	0	0	0	0	0	0	0	0	0	1
50	1	48	1	12	2	12	2012-10-12	0	0	0	0	0	0	0	0	0	0	0	1
194	1	42	2	13	2	8	2012-03-02	0	0	0	0	0	0	0	0	0	0	0	1
338	2	70	1	13	2	1	2012-03-10	0	0	0	0	0	0	0	0	0	0	0	1
340	1	59	1	13	2	8	2012-03-13	0	0	0	0	0	0	0	0	0	0	0	1
266	1	43	1	13	2	3	2012-03-19	0	0	0	0	0	0	0	0	0	0	0	1
347	1	27	2	13	2	10	2012-03-19	0	0	0	0	0	0	0	0	0	0	0	1
358	2	57	2	13	2	1	2012-03-29	0	0	0	0	0	0	0	0	0	0	0	1
386	1	46	2	13	2	8	2012-04-08	0	0	0	0	0	0	0	1	0	0	1	2
406	2	67	1	13	2	10	2012-05-03	0	0	0	0	0	0	0	0	0	0	0	1
407	1	25	2	13	2	1	2012-05-03	0	0	0	0	0	0	0	0	0	0	0	1
415	1	60	2	13	2	7	2012-05-12	1	1	0	0	0	0	1	0	1	0	4	2
435	2	53	2	13	2	1	2012-06-01	0	0	0	0	0	0	0	0	0	0	0	1
448	1	37	1	13	2	10	2012-06-13	0	0	0	0	0	0	0	0	0	0	0	1
82	1	36	2	13	2	1	2012-08-31	0	0	0	0	0	0	0	0	0	0	0	1
71	1	45	1	13	2	1	2012-09-06	0	0	0	0	0	0	0	0	0	0	0	1
72	1	46	2	13	2	3	2012-09-06	0	0	0	0	0	0	0	0	0	0	0	1
365	1	41	2	14	2	1	2012-01-23	0	0	0	0	0	0	0	1	0	0	1	2
316	2	25	2	14	2	8	2012-01-30	0	0	0	0	0	0	0	0	0	0	0	1
367	1	21	1	14	2	10	2012-02-17	0	0	0	0	0	0	0	0	0	0	0	1
198	1	26	2	14	2	1	2012-03-06	0	0	0	0	0	0	0	0	0	0	0	1
336	1	26	2	14	2	1	2012-03-06	0	0	0	0	0	0	0	0	0	0	0	1
339	1	67	1	14	2	7	2012-03-11	0	0	0	0	0	0	0	0	0	0	0	1
351	2	49	2	14	2	3	2012-03-21	0	0	0	0	0	0	0	0	0	0	0	1
377	1	22	1	14	2	1	2012-04-01	0	0	0	0	0	0	0	0	0	0	0	1
384	1	29	1	14	2	1	2012-04-07	0	0	0	0	0	0	0	0	0	0	0	1
402	2	25	1	14	2	1	2012-04-28	0	0	0	0	0	0	0	0	0	0	0	1
226	1	22	1	14	2	1	2012-05-04	0	0	0	0	0	0	0	0	0	0	0	1
409	2	44	2	14	2	3	2012-05-05	0	0	0	0	0	0	0	0	0	0	0	1
420	1	53	1	14	2	1	2012-05-18	0	1	0	1	0	0	0	0	0	0	2	2
236	1	49	2	14	2	6	2012-05-24	0	0	0	0	0	0	0	0	0	0	0	1
274	2	41	2	14	2	1	2012-06-01	0	0	0	0	0	0	0	0	0	0	0	1
434	2	41	2	14	2	1	2012-06-01	0	0	0	0	0	0	0	0	1	0	1	2
148	1	42	1	14	2	4	2012-06-24	0	0	0	0	0	0	0	0	0	0	0	1
281	1	42	1	14	2	4	2012-06-24	0	0	0	0	0	0	0	0	0	0	0	1
284	1	19	2	14	2	1	2012-07-04	0	0	0	0	0	0	0	0	0	0	0	1
158	1	74	1	14	2	7	2012-07-13	0	0	0	0	0	0	0	0	0	0	0	1
176	1	45	1	14	2	1	2012-08-04	0	0	0	0	0	0	0	0	0	0	0	1
96	1	58	2	14	2	7	2012-08-14	0	0	0	0	0	0	0	0	0	0	0	1
84	1	29	2	14	2	1	2012-08-29	0	0	0	0	0	0	0	0	0	0	0	1
69	1	33	2	14	2	1	2012-09-12	0	0	0	0	0	0	0	0	0	0	0	1
30	1	38	2	14	2	1	2012-11-02	0	0	0	0	0	0	0	0	0	0	0	1
24	1	53	2	14	2	1	2012-11-09	0	0	0	0	0	0	0	0	0	0	0	1
335	1	17	1	16	3	1	2012-03-04	0	0	0	0	0	0	0	0	0	0	0	1
214	1	55	1	16	3	7	2012-04-08	0	0	0	0	0	0	0	0	0	0	0	1
443	2	31	2	16	3	1	2012-06-11	0	0	0	0	0	0	0	0	0	0	0	1
143	2	61	1	16	3	2	2012-06-16	0	0	0	0	0	0	0	0	0	0	0	1
122	1	41	2	16	3	2	2012-07-06	0	0	0	0	0	0	0	0	0	0	0	1
97	1	20	2	16	3	1	2012-08-13	0	0	0	0	0	0	0	0	0	0	0	1
73	2	20	1	16	3	1	2012-09-05	0	0	0	0	0	0	0	0	0	0	0	1
44	1	29	2	16	3	1	2012-10-16	0	0	0	0	0	0	0	0	0	0	0	1
2	2	70	2	16	3	1	2012-11-30	0	0	0	0	0	0	0	0	0	0	0	1
3	1	25	1	16	3	6	2012-12-01	0	0	0	0	0	0	0	0	0	0	0	1
310	1	31	1	17	3	1	2012-01-14	0	0	0	0	0	0	0	0	0	0	0	1
317	2	20	1	17	3	8	2012-01-29	0	0	0	0	0	0	0	0	0	0	0	1
324	1	53	1	17	3	7	2012-02-16	0	0	0	0	0	0	0	0	0	0	0	1
373	1	52	2	17	3	1	2012-03-11	0	0	0	0	0	0	0	0	0	0	0	1
202	2	66	2	17	3	1	2012-03-18	0	0	0	0	0	0	0	0	0	0	0	1
345	2	66	2	17	3	1	2012-03-18	0	0	0	0	0	0	0	0	0	0	0	1
348	1	51	3	17	3	8	2012-03-20	1	0	0	0	0	0	2	0	0	1	4	2
204	2	17	2	17	3	1	2012-03-22	0	0	0	0	0	0	0	0	0	0	0	1
207	1	62	1	17	3	7	2012-03-24	0	0	0	0	0	0	0	0	0	0	0	1
353	1	63	1	17	3	7	2012-03-24	0	0	0	0	0	0	0	0	0	0	0	1
379	1	35	2	17	3	4	2012-04-04	0	0	0	0	0	0	0	0	0	0	0	1
216	2	67	2	17	3	1	2012-04-11	0	0	0	0	0	0	0	0	0	0	0	1
389	1	16	2	17	3	1	2012-04-11	0	0	0	0	0	0	0	0	0	0	0	1
217	1	22	2	17	3	7	2012-04-14	0	0	0	0	0	0	0	0	0	0	0	1
432	1	66	2	17	3	10	2012-05-30	0	0	0	0	0	0	0	0	0	0	0	1
440	1	54	1	17	3	1	2012-06-06	0	0	0	0	0	0	0	0	0	0	0	1
247	1	48	2	17	3	5	2012-06-12	0	0	0	0	0	0	0	0	0	0	0	1
278	1	48	2	17	3	5	2012-06-12	0	0	0	0	0	0	0	0	0	0	0	1
451	1	19	2	17	3	1	2012-06-16	0	0	0	0	0	0	0	0	0	0	0	1
136	1	23	2	17	3	3	2012-06-23	0	0	0	0	0	0	0	0	0	0	0	1
145	1	23	2	17	3	3	2012-06-23	0	0	0	0	0	0	0	0	0	0	0	1
151	1	25	2	17	3	6	2012-06-30	0	0	0	0	0	0	0	0	0	0	0	1
123	1	57	1	17	3	8	2012-07-05	0	0	0	0	0	2	0	0	2	0	4	2
103	2	37	1	17	3	10	2012-08-06	0	0	0	0	0	0	0	0	0	0	0	1
291	1	16	2	17	3	1	2012-08-17	0	0	0	0	0	0	0	0	0	0	0	1
92	1	35	1	17	3	6	2012-08-20	0	0	0	0	0	0	0	0	0	0	0	1
42	1	68	1	17	3	8	2012-10-21	0	0	0	0	0	0	0	0	1	1	2	2
34	1	67	1	17	3	10	2012-10-26	0	0	0	0	0	0	0	0	0	0	0	1
25	1	26	1	17	3	7	2012-11-08	0	0	0	0	0	0	0	0	0	0	0	1
22	1	24	1	17	3	10	2012-11-10	0	0	0	0	0	0	0	0	0	0	0	1
300	1	28	2	17	3	8	2012-11-24	0	0	0	0	0	0	0	0	1	0	1	2
10	1	43	1	17	3	13	2012-12-15	0	0	0	0	0	0	0	0	0	0	0	1
182	2	59	1	18	3	8	2012-01-23	0	0	0	0	0	0	0	0	0	0	0	1
228	2	21	2	18	3	1	2012-05-05	0	0	0	0	0	0	0	0	0	0	0	1
408	2	43	1	18	3	1	2012-05-05	0	0	0	0	0	0	0	0	1	0	1	2
450	1	45	1	18	3	6	2012-06-16	0	0	0	0	0	0	0	0	0	0	0	1
121	1	36	2	18	3	17	2012-07-07	0	0	0	0	0	0	0	0	0	0	0	1
101	1	30	2	18	3	1	2012-08-10	0	0	0	0	0	0	0	0	0	0	0	1
81	2	29	2	18	3	8	2012-08-31	0	0	0	0	0	0	0	0	0	0	0	1
78	2	26	2	18	3	1	2012-09-02	0	0	0	0	0	2	0	5	2	0	9	2
307	1	42	2	19	3	7	2012-01-07	4	1	1	0	0	0	1	0	1	0	8	2
184	1	44	2	19	3	1	2012-01-28	0	0	0	0	0	0	0	0	0	0	0	1
186	1	33	1	19	3	1	2012-02-02	0	0	0	0	0	0	0	0	0	0	0	1
332	1	25	2	19	3	7	2012-02-29	0	0	0	0	0	0	0	0	0	0	0	1
131	1	36	1	19	3	7	2012-06-27	0	0	0	0	0	0	0	0	0	0	0	1
80	1	18	2	19	3	1	2012-08-31	0	0	0	0	0	0	0	0	0	0	0	1
293	1	21	1	19	3	7	2012-09-12	1	0	0	0	0	0	0	0	0	0	1	2
48	1	22	2	19	3	1	2012-10-10	0	0	0	0	0	0	0	0	0	0	0	1
299	1	23	2	19	3	1	2012-11-20	0	0	0	0	0	0	0	0	0	0	0	1
308	1	45	1	20	3	10	2012-01-09	0	0	0	0	0	0	0	0	0	0	0	1
320	1	45	2	20	3	1	2012-02-08	0	0	0	0	0	0	0	0	3	0	3	2
325	1	36	1	20	3	9	2012-02-19	0	0	0	0	0	0	0	0	0	0	0	1
208	2	34	2	20	3	6	2012-03-27	0	0	0	0	0	0	0	0	0	0	0	1
209	1	20	2	20	3	3	2012-03-30	0	0	0	0	0	0	0	0	0	0	0	1
385	2	37	2	20	3	1	2012-04-08	0	0	0	0	0	0	0	0	0	0	0	1
397	1	54	1	20	3	7	2012-04-22	0	0	0	0	0	0	0	0	0	0	0	1
454	1	69	2	20	3	8	2012-06-16	0	0	0	0	0	0	0	0	0	0	0	1
98	1	21	2	20	3	7	2012-08-12	0	0	0	0	0	0	0	0	0	0	0	1
95	1	99	2	20	3	7	2012-08-15	0	0	0	0	0	0	0	0	0	0	0	1
21	1	53	2	20	3	10	2012-11-26	0	0	0	0	0	0	0	0	0	0	0	1
192	1	32	1	20	3	1	2/27/2012	0	0	0	0	0	0	0	0	0	0	0	1
383	1	38	2	21	3	7	2012-04-06	0	0	0	0	0	0	0	0	0	0	0	1
400	1	34	1	21	3	1	2012-04-24	0	0	0	0	0	0	0	0	0	0	0	1
271	1	71	2	21	3	1	2012-04-30	0	0	0	0	0	0	0	0	0	0	0	1
403	1	71	2	21	3	1	2012-04-30	0	0	0	0	0	0	0	0	0	0	0	1
240	2	26	2	21	3	8	2012-06-03	0	0	0	0	0	0	0	0	0	0	0	1
245	1	37	2	21	3	1	2012-06-10	0	0	0	0	0	0	0	0	0	0	0	1
119	1	17	2	21	3	8	2012-07-12	0	0	0	0	0	0	0	0	0	0	0	1
157	1	17	2	21	3	8	2012-07-12	0	0	0	0	0	0	0	0	0	0	0	1
173	1	41	2	21	3	7	2012-07-31	0	0	0	0	0	0	0	0	0	0	0	1
254	2	56	1	22	3	1	2012-01-16	0	0	0	0	0	0	0	0	0	0	0	1
328	1	43	1	22	3	7	2012-02-24	0	0	0	0	0	0	0	1	6	0	7	2
237	2	27	2	22	3	1	2012-05-24	0	0	0	0	0	0	0	0	0	0	0	1
290	1	20	1	22	3	1	2012-08-13	0	0	0	0	0	0	0	0	0	0	0	1
67	2	56	2	22	3	1	2012-09-16	0	0	0	0	0	0	0	0	0	0	0	1
62	1	21	2	22	3	1	2012-09-25	0	0	0	0	0	0	0	0	0	0	0	1
303	1	32	2	22	3	1	2012-12-23	1	0	0	0	0	0	0	0	0	0	1	2
330	2	43	2	24	3	1	2012-02-24	0	0	0	0	0	0	0	0	0	0	0	1
417	1	67	2	24	3	3	2012-05-14	0	0	0	0	0	0	0	0	0	0	0	1
445	2	31	1	24	3	8	2012-06-11	0	0	0	0	0	0	0	0	0	0	0	1
76	1	30	3	24	3	12	2012-09-02	0	0	0	0	0	0	0	0	1	0	1	2
195	1	25	1	25	3	1	2012-03-04	0	0	0	0	0	0	0	0	0	0	0	1
213	1	32	2	25	3	10	2012-04-06	0	0	0	0	0	0	0	0	0	0	0	1
219	1	47	2	25	3	1	2012-04-17	0	0	0	0	0	0	0	0	0	0	0	1
430	2	37	1	25	3	10	2012-05-29	0	0	0	0	0	0	0	0	0	0	0	1
156	1	50	2	25	3	10	2012-07-08	0	0	0	0	0	0	0	0	0	0	0	1
285	1	50	2	25	3	10	2012-07-08	0	0	0	0	0	0	0	0	0	0	0	1
181	1	27	2	26	3	1	2012-01-19	0	0	0	0	0	0	0	0	0	0	0	1
312	2	59	2	26	3	8	2012-01-23	0	0	0	0	0	0	0	0	0	0	0	1
230	1	27	1	26	3	7	2012-05-09	0	0	0	0	0	0	0	0	0	0	0	1
113	1	18	2	26	3	12	2012-07-22	0	0	0	0	0	0	0	0	0	0	0	1
75	1	52	2	26	3	6	2012-09-04	0	1	0	0	0	0	0	0	1	0	2	2
56	1	17	1	26	3	7	2012-09-30	0	0	0	0	0	0	0	0	0	0	0	1
1	2	69	1	26	3	9	2012-11-29	0	0	0	0	0	0	0	0	0	0	0	1
7	1	13	2	26	3	12	2012-12-28	0	0	0	0	0	0	0	0	0	0	0	1
350	1	23	2	27	3	1	2012-03-21	0	0	0	0	0	0	0	0	0	0	0	1
221	1	48	1	27	3	7	2012-04-27	0	0	0	0	0	0	0	0	0	0	0	1
416	1	46	2	27	3	9	2012-05-13	0	0	0	0	0	0	0	0	0	0	0	1
426	1	68	1	27	3	1	2012-05-26	0	0	0	0	0	0	0	0	0	0	0	1
135	2	18	2	27	3	12	2012-06-23	0	0	0	0	0	0	0	0	0	0	0	1
124	1	25	2	27	3	7	2012-07-05	0	0	0	0	0	0	0	0	0	0	0	1
112	1	32	2	27	3	1	2012-07-22	0	0	0	0	0	0	0	0	0	0	0	1
170	1	56	2	27	3	7	2012-07-28	0	0	0	0	0	0	0	0	0	0	0	1
83	1	23	2	27	3	1	2012-08-30	0	0	0	0	0	0	0	0	0	0	0	1
23	1	34	2	27	3	7	2012-11-10	0	0	0	0	0	0	0	0	0	0	0	1
19	1	31	1	27	3	7	2012-11-17	0	0	0	0	0	0	0	0	0	0	0	1
329	1	38	2	29	3	7	2012-02-24	0	0	0	0	0	0	0	0	0	0	0	1
267	1	59	2	29	3	3	2012-03-29	0	0	0	0	0	0	0	0	0	0	0	1
268	1	23	2	29	3	1	2012-03-30	1	1	1	0	0	0	0	0	0	0	3	2
359	1	23	2	29	3	1	2012-03-30	1	1	1	0	0	0	0	0	0	0	3	2
392	1	55	2	29	3	1	2012-04-17	0	0	0	0	0	0	0	0	0	0	0	1
223	1	51	1	29	3	7	2012-04-29	0	0	0	0	0	0	0	0	0	0	0	1
433	2	29	2	29	3	1	2012-05-31	0	0	0	0	0	0	0	0	0	0	0	1
138	1	41	2	29	3	1	2012-06-20	0	0	0	0	0	0	0	0	0	0	0	1
162	1	54	2	29	3	10	2012-07-22	0	0	0	0	0	0	0	0	0	0	0	1
106	1	23	2	29	3	1	2012-08-03	0	0	0	0	0	0	0	0	0	0	0	1
288	1	23	2	29	3	1	2012-08-03	0	0	0	0	0	0	0	0	0	0	0	1
104	2	21	1	29	3	8	2012-08-05	0	0	0	0	0	0	0	0	0	0	0	1
89	1	21	2	29	3	1	2012-08-25	0	0	0	0	0	0	0	0	0	0	0	1
70	2	46	1	29	3	8	2012-09-07	0	0	0	0	0	0	0	0	1	0	1	2
63	1	15	2	29	3	8	2012-09-24	0	0	0	0	0	0	0	0	0	0	0	1
46	1	49	1	29	3	7	2012-10-12	0	0	0	0	0	0	0	0	0	0	0	1
13	1	41	2	29	3	1	2012-12-05	0	0	0	0	0	0	0	0	0	0	0	1
304	1	22	2	29	3	7	2012-12-24	0	0	0	0	0	0	0	0	0	0	0	1
29	1	26	1	30	3	7	2012-11-04	0	0	0	0	0	0	0	0	0	0	0	1
130	2	23	1	33	3	8	2012-06-27	0	0	0	0	0	0	0	0	0	0	0	1
177	2	16	2	34	3	1	2012-01-01	0	0	0	0	0	0	0	0	0	0	0	1
193	1	57	1	34	3	2	2012-03-01	0	0	0	0	0	0	0	0	0	0	0	1
246	1	58	1	34	3	1	2012-06-10	1	0	0	0	0	0	0	0	0	0	1	2
163	1	48	2	34	3	1	2012-07-22	0	0	0	0	0	0	0	0	0	0	0	1
85	1	19	1	34	3	1	2012-08-28	0	0	0	0	0	0	0	0	0	0	0	1
60	1	27	2	34	3	7	2012-09-27	0	0	0	0	0	0	0	0	0	0	0	1
26	1	60	2	34	3	1	2012-11-06	0	0	0	0	0	0	0	0	0	0	0	1
301	2	28	2	34	3	1	2012-12-07	0	0	0	0	0	0	0	0	0	0	0	1
114	1	27	2	35	3	1	2012-07-22	0	0	0	0	0	0	0	0	0	0	0	1
311	2	35	1	36	3	9	2012-01-22	2	0	2	0	0	0	0	0	2	0	6	2
185	1	58	1	36	3	8	2012-02-01	0	0	0	0	0	0	0	0	0	0	0	1
58	1	59	1	36	3	6	2012-09-27	0	0	0	0	0	0	0	1	4	0	5	2
187	1	84	2	38	3	8	2012-02-10	2	0	0	0	0	0	0	0	0	0	2	2
321	1	84	2	38	3	8	2012-02-10	1	1	0	0	0	0	0	0	2	0	4	2
116	1	49	1	38	3	3	2012-07-21	0	0	0	0	0	0	0	0	0	0	0	1
91	1	35	2	38	3	1	2012-08-22	0	0	0	0	0	0	0	0	0	0	0	1
15	2	29	1	38	3	1	2012-11-24	0	0	0	0	0	0	0	0	0	0	0	1
252	1	49	2	41	3	1	2012-01-12	0	0	0	0	0	0	0	0	0	0	0	1
256	1	83	1	41	3	2	2012-01-22	0	0	0	0	0	0	0	0	0	0	0	1
128	1	34	2	41	3	1	2012-06-30	0	0	0	0	0	0	0	0	0	0	0	1
20	2	29	2	41	3	8	2012-11-17	0	0	0	0	0	0	0	0	0	0	0	1
32	1	58	1	42	3	7	2012-10-27	0	0	0	0	0	0	0	0	0	0	0	1
201	1	30	1	48	3	8	2012-03-17	0	0	0	0	0	0	0	0	0	0	0	1
27	1	39	1	50	3	1	2012-11-06	0	0	0	0	0	0	0	0	0	0	0	1
218	1	21	1	57	3	1	2012-04-21	0	0	0	0	0	0	0	0	0	0	0	1
188	1	23	2	75	3	7	2012-02-11	0	0	0	0	0	0	0	0	0	0	0	1
197	1	49	1	75	3	1	2012-03-05	0	0	0	0	0	0	0	0	0	0	0	1
74	1	24	1	75	3	10	2012-09-05	0	0	0	0	0	0	0	0	0	0	0	1
61	1	77	2	75	3	8	2012-09-26	0	0	0	0	0	0	0	0	0	0	0	1

## Sheet: Legend Variable definition
Legend: Explanation
Variable:	Groups in Variable:
Patient Number	numerical
Sex	male=1
	female=2
Age	numerical
Race	White (Non-Hispanic)=1
	Hispanic=2
	Black=3
	Asian=4
	Native American=5
	Other=6
ISS Score	numerical
ISS Groups	<9=1
	9-16=2
	>16=3
Mechanism of Injury	MVC=1
	Fall <3.3 ft.=2
	Fall3.3ft-19 ft.=3
	Fall >19.1 ft.=4
	Fall not specified height=5
	Assault=6
	Motorcycle=7
	Pedestrian=8
	Bicycle=9
	Other Blunt=10
	Knife=11
	Handgun=12
	Shotgun=13
	Other gun=14
	Glass=15
	Biting=16
	Other Penetrating=17
	Chemical Burn=18
	Inhalation Burn=19
	Thermal Burn=20
	Electrical Burn=21
	Other Burns Mechanism=22
Date of Pan-Scan	Date
Cervical Spine	Number of Studies Prior to PAN Scan
Facial Bones	Number of Studies Prior to PAN Scan
Thoracic Spine	Number of Studies Prior to PAN Scan
Lumbar Spine	Number of Studies Prior to PAN Scan
Angio of Neck	Number of Studies Prior to PAN Scan
Chest	Number of Studies Prior to PAN Scan
Soft Tissue Neck	Number of Studies Prior to PAN Scan
Abdominal/Pelvis	Number of Studies Prior to PAN Scan
Head	Number of Studies Prior to PAN Scan
Extremity	Number of Studies Prior to PAN Scan
Total Previous CT Done on Subject	Sum of All Previous Studies (Number)
Had Previous CT y/n	Previous CT yes=1
	Previous CT no=2
